# Supplementary material for: Steroids in fluid and/or vasoactive infusion dependent pediatric shock: study protocol for a randomized controlled trial
Source: PubMed Central journal article supplement (PMC4859989; doi:10.1186/s13063-016-1365-6), 2016-05-06
Supplement: 13063_2016_1365_MOESM2_ESM.pdf [file 13063_2016_1365_MOESM2_ESM.pdf]

## Additional file 2: Summary of Mechanistic Studies

| Analysis                                      | Rationale                                                                                                                                                                                                                                                                                                                                                                                                                                                                                                                                                                              | Timing of Test                        | Amount of Blood Required |
|-----------------------------------------------|----------------------------------------------------------------------------------------------------------------------------------------------------------------------------------------------------------------------------------------------------------------------------------------------------------------------------------------------------------------------------------------------------------------------------------------------------------------------------------------------------------------------------------------------------------------------------------------|---------------------------------------|--------------------------|
| Free cortisol versus total cortisol           | The ideal method for measurement of adrenal function in critical illness is highly controversial. Adrenocorticotrophic hormone stimulation testing is expensive, cumbersome and difficult to interpret [1, 2] random total cortisol levels may be affected by serum protein levels in critical illness [3-5] and have not consistently correlated with clinically important outcomes [1, 6]. Some recent studies have suggested that free cortisol levels may better reflect adrenal function in critical illness but these studies have not been linked to outcomes in an RCT [7, 8]. | Prior to administration of study drug | 0.6 ml                   |
| Stratification biomarkers                     | It is currently difficult to predict the outcome of patients with septic shock. Previous studies have shown that younger age[9] was a risk factor for illness severity in these patients. However, more recent gene-expression based work [10, 11] has supported the existence of septic shock sub-classes that predict mortality based on a 100-gene expression signature. Further validation of this finding as a stratification tool for clinical trials is still needed.                                                                                                           | Within 24 hours of admission          | 0.1 ml                   |
| 25 hydroxyvitamin D and 1,25 hydroxyvitamin D | The hemodynamic status of a patient in shock is a complex interplay between a variety of autonomic, endocrine and physiologic parameters. Although cortisol is felt to play an important role in this hemodynamic status, a recent study by our group suggested that Vitamin D deficiency may have an additive effect on hemodynamic instability [12].                                                                                                                                                                                                                                 | Within 24 hours of admission          | 0.5 ml                   |

1. Crowley S, Hindmarsh PC, Honour JW, Brook CG. Reproducibility of the cortisol response to stimulation with a low dose of ACTH(1-24): the effect of basal cortisol levels and comparison of low-dose with high-dose secretory dynamics. *J Endocrinol.* 1993;136(1):167-72.
2. Nye EJ, Grice JE, Hockings GI, Strakosch CR, Crosbie GV, Walters MM et al. Adrenocorticotropin stimulation tests in patients with hypothalamic-pituitary disease: low dose, standard high dose and 8-h infusion tests. *Clin Endocrinol (Oxf).* 2001;55(5):625-33.
3. Beishuizen A, Thijs LG, Vermes I. Patterns of corticosteroid-binding globulin and the free cortisol index during septic shock and multitrauma. *Intensive care medicine.* 2001;27(10):1584-91. doi:10.1007/s001340101073.

4. Hamrahian AH, Oseni TS, Arafah BM. Measurements of serum free cortisol in critically ill patients. *The New England journal of medicine*. 2004;350(16):1629-38. doi:10.1056/NEJMoa020266.
5. Zimmerman JJ DS, Barker RM, et al. Real-time cortisol quantification among critically ill children. *Pediatr Crit Care Med*. 2010.
6. Hatherill M, Tibby SM, Hilliard T, Turner C, Murdoch IA. Adrenal insufficiency in septic shock. *Arch Dis Child*. 1999;80(1):51-5.
7. Poomthavorn P, Lertbunrian R, Preutthipan A, Sriphrapadang A, Khlairit P, Mahachoklertwattana P. Serum free cortisol index, free cortisol, and total cortisol in critically ill children. *Intensive care medicine*. 2009;35(7):1281-5. doi:10.1007/s00134-009-1480-x.
8. Bendel S, Karlsson S, Pettila V, Loisa P, Varpula M, Ruokonen E et al. Free cortisol in sepsis and septic shock. *Anesth Analg*. 2008;106(6):1813-9. doi:10.1213/ane.0b013e318172fdb.
9. Menon K, Ward RE, Lawson ML, Gaboury I, Hutchison JS, Hebert PC et al. A prospective multicenter study of adrenal function in critically ill children. *Am J Respir Crit Care Med*. 2010;182(2):246-51. doi:10.1164/rccm.200911-1738OC.
10. Wong HR, Salisbury S, Xiao Q, Cvijanovich NZ, Hall M, Allen GL et al. The pediatric sepsis biomarker risk model. *Crit Care*. 2012;16(5):R174. doi:10.1186/cc11652.
11. Wong HR, Weiss SL, Giuliano JS, Jr., Wainwright MS, Cvijanovich NZ, Thomas NJ et al. Testing the prognostic accuracy of the updated pediatric sepsis biomarker risk model. *PLoS One*. 2014;9(1):e86242. doi:10.1371/journal.pone.0086242.
12. McNally JD, Menon K, Chakraborty P, Fisher L, Williams KA, Al-Dirbashi OY et al. The association of vitamin D status with pediatric critical illness. *Pediatrics*. 2012;130(3):429-36. doi:10.1542/peds.2011-3059.
